# Supplementary material for: Characterization and optimization of liquid electrodes for lateral dielectrophoresis
Source: Royal Society of Chemistry journal article supplement (doi:10.1039/b612866a), 2007-01-01
Supplement: b612866a.pdf [file b612866a.pdf]

### Calculation of $B$ , $C$ , $D$ and $k$

In order to fully specify the mapping functions, we need to calculate  $B$ ,  $C$ ,  $D$  and  $k$ . These parameters result from the constraint that the arrangement of the electrodes in the  $V$ -plane should be symmetrical around the origin (Fig 2b). Starting in the  $Z$ -plane, the coordinates of the corners of the electrodes ( $z_1$  to  $z_4$ , Fig 2d) are known and correspond to the physical geometry of the chip:

$$z_1 = ih, \quad z_2 = 0, \quad z_3 = s/2, \quad z_4 = s/2 + w \quad (1)$$

where  $s$  is the insulator width and  $w$  the electrode width. The sinh transformation (eq. 11) projects them onto  $u_1$  to  $u_4$  (Fig 2c):

$$\begin{cases} u_1 = \text{Sinh}\left(i\frac{\pi}{2}\right) \\ u_2 = \text{Sinh}\left(-i\frac{\pi}{2}\right) \\ u_3 = \text{Sinh}\left(\frac{\pi s}{2h} - i\frac{\pi}{2}\right) \\ u_4 = \text{Sinh}\left(\frac{\pi s + 2\pi w}{2h} - i\frac{\pi}{2}\right) \end{cases} \quad (2)$$

In the  $V$ -plane, this must become a symmetrical arrangement, with  $v_1 = -v_4 = -1/k$ ,  $v_2 = -1$ ,  $v_3 = 1$ . Plugging all the values for  $u_1$  to  $u_4$  and  $v_1$  to  $v_4$  into the mapping function in eqn (9) yields a system of four equations:

$$\begin{cases} \frac{u_1 + B}{Cu_1 + D} = -\frac{u_4 + B}{Cu_4 + D} \\ \frac{u_2 + B}{Cu_2 + D} = -1 \\ \frac{u_3 + B}{Cu_3 + D} = 1 \end{cases} \quad (3)$$

Solving the system of equations for  $B$ ,  $C$  and  $D$  then gives the the following expression for  $k$ :

$$k = \frac{1}{v_4} = \frac{Cu_4 + D}{u_4 + B} \quad (4)$$

Now all the parameters for the three steps of conformal mappings are determined and allow to calculate the cell constant and the distribution of the electric field in the physical structure in Fig. 2e from a simple geometry in Fig. 2a.
